# Supplementary material
Source: publisher figshare collection journal article supplement (https://gsapubs.figshare.com/ndownloader/files/27693171)
Supplement: Supplementary file 1 [file 27693171]

## Sheet: Ig zircon summary
Sample	location	best age (Ma)	2 sigma	method	latitude	longitude	rock type	notes
BFB1	Florida Mt., NM	508.8	5.8	Terra-Wasserberg, intercept	32.1102	-107.638	syenite	(Geissmann et al., 1991)
QM1	Quartz Mt., OK	535.4	6.8	Terra-Wasserberg, intercept	34.8879	-99.2975	granite	Lugert Granite (Powell et al., 1980)
SHCR1	Slick Hills, OK	526	21	Terra-Wasserberg, intercept	34.8205	-98.5274	rhyolite	Carlton Rhyolite Group (Powell et al., 1980); exposed at restraining bend (?)
WMG1	Mt. Scott, OK	554	10	Terra-Wasserberg, intercept	34.746	-98.533	granite	Mount Scott Granite (Powell et al., 1980)
SAFT8	Wet Mts., CO	531.9	28.7	Weighted Mean, concordant	38.3427	-105.463	nepheline syenite	McClure Mountain syenite (Schoene and Bowring, 2006)

## Sheet: SHCR1
Element	Si29	Ti49	Zr91		La139	Ce140	Pr141	Nd146		Sm147	Eu153	Gd157	Tb159	Dy163	Ho165	Er167	Tm169	Yb172	Lu175		Hf178	Hg202	Hg201	Pb204	Pb206	Pb207	Pb208	Th232	U238	Pm147	Hg204	Po208	U232	Pu238		Th/U
SHCR11_1	0.935	0.0149	75647.6		12.02	19.43	16.72	23.95		67.81	43.6	203.53	320.14	524.32	745.27	1078.17	1532.7	2021.87	1749.03		39301.2	0	0	0	7.63	0.833	0.925	1029.08	6871.06	<****	0	<****	<****	<****		0.14977
SHCR11_11	0.935	0.0316	75229.7		0.222	11.65	0.571	1.97		11.07	5.43	44.83	83.33	168.91	262.18	401.82	649.95	963.97	906.4		46399.3	0	0	0	3.54	0.477	0.518	447.1	3311.46	<****	0	<****	<****	<****		0.135016
SHCR11_12	0.935	0.0351	74467.6		0.415	17.2	0.723	2.3		14.9	6.12	66.64	124.27	243.45	370.41	586.08	945.64	1347.61	1184.32		49679.3	0	0	0.55	7.62	0.927	1.067	1029.96	6928.18	<****	0	<****	<****	<****		0.148662
SHCR11_13c	0.935	0.0166	72512.1		0.0235	33.1	2	7.19		45.9	23.3	178.5	290.25	536.13	759.03	1148.32	1664.96	2367.32	1940.8		42149.2	0	0	0	18.31	1.306	2.02	3458.26	18726.4	<****	0	<****	<****	<****		0.184673
SHCR11_14	0.935	0.0321	70879.3		1.686	12.86	9.84	2.84		15.27	7.26	56.69	101.34	191.36	309.71	492.67	806.48	1081.23	995.75		47689.9	0	0	1.11	4.88	1.071	1.119	510.07	4006.18	<****	0	<****	<****	<****		0.127321
SHCR11_16	0.935	0.329	67440		0.199	15.17	0.342	2.2		14.48	4.93	57.95	105	207.52	333.39	504.75	854.49	1160.27	1089.4		43791.4	0	0	1.45	7.77	1.057	1.15	868.14	6709.37	<****	0	<****	<****	<****		0.129392
SHCR11_19c	0.935	0.124	60393.3		0.945	31.41	4.8	9.16		52.3	10.51	161.81	270.86	506.87	769.12	1264.02	2139.52	3410.57	2612.38		45209.3	0	0	0	50.9	3.83	3.46	4883.34	48810.4	<****	0	<****	<****	<****		0.100047
SHCR11_21	0.935	0.0159	68884.2		54.75	59.22	55.5	48.64		48.96	10.83	67.51	99.23	180.61	272.81	422.59	706.35	1039.35	893.91		45596.5	0	0	0	4.02	0.414	0.431	472.57	4006.68	<****	0	<****	<****	<****		0.117946
SHCR11_22	0.935	0.0145	67607.5		0.261	13.97	0.28	1.067		7.41	1.93	35.54	71.39	147.87	270.42	435.46	796.66	1277	1271		53612.9	0	0	0	2.46	0.355	0.465	3272.88	19413.6	<****	0	<****	<****	<****		0.168587
SHCR11_23	0.935	0.0339	77821.9		0.285	17.32	1.74	4.95		30.64	15.93	112.35	190.22	333.36	545.04	816.69	1286.55	1665.3	1559.45		47666.5	0	0	0	5.22	0.602	0.811	1069.63	5242.16	<****	0	<****	<****	<****		0.204044
SHCR11_25	0.935	0.0319	69023.6		0.957	16.05	2.5	5.99		35.45	14.23	109.58	188.33	332.04	519.98	746.92	1112.33	1685.02	1413.64		39971.8	0	0	0	5.72	0.519	0.801	1067.33	5928.34	<****	0	<****	<****	<****		0.180039
SHCR11_27	0.935	0.173	67860.8		85.46	89.19	83.44	88.2		106.8	36.12	207.61	295.05	493.39	729.76	969.26	1518.74	2157.69	1669.96		39566.9	0	0	0	9.93	1.042	1.258	1525.27	10272.5	<****	0	<****	<****	<****		0.148481
SHCR11_28	0.935	0.023	66176.2		0.6	8.94	1.058	2.76		16.96	8.14	64.85	113.99	215.85	313.49	472.54	755.88	1101.32	937.02		37264.1	0	0	0	5.49	0.525	0.562	716.66	5702.28	<****	0	<****	<****	<****		0.12568
SHCR11_34	0.935	0.0223	66736.6		0.678	13.47	1.134	2.85		14.39	6.28	60.22	104.78	200.52	337.51	461.94	784	1110.46	998.15		41743.2	0	0	0.8	5.6	0.643	0.771	823.47	5907.68	<****	0	<****	<****	<****		0.13939
SHCR11_35	0.935	0.123	62337.8		10.8	27.03	7.71	8.96		26.97	7.51	86.31	149.95	279.15	442.3	663.51	1063.14	1522.15	1310.25		38271.9	0	0	0	7.45	0.83	1.077	1186.89	7476.95	<****	0	<****	<****	<****		0.15874
SHCR11_36	0.935	0.0222	69390.2		0.184	7.82	3.16	9.35		50.48	54.23	180.97	291.73	503.54	743.14	942.91	1443.35	1998.76	1655.18		37088.3	0	0	0	5.62	0.496	0.606	907.83	6087.66	<****	0	<****	<****	<****		0.149126
SHCR11_37	0.935	0.0184	68925.2		0.609	27.17	2.06	4.9		25.63	11.06	91.49	173.56	307.75	481.58	755.37	1174.08	1558.41	1571.62		51326.9	0	0	1.31	7.33	1.11	1.234	1227.57	7195.39	<****	0	<****	<****	<****		0.170605
SHCR11_38	0.935	0.0227	59786		44.23	74.37	42.02	43.22		53.58	10.75	128.07	226.82	413.47	602.14	833.02	1382.79	1914.89	1662.68		44240.2	0	0	1.68	16.6	2.22	2.72	2405.08	17011.3	<****	0	<****	<****	<****		0.141382
SHCR11_4	0.935	0.105	66708.2		412.03	354.42	431.92	388.35		262.32	55.14	266.41	249.52	359.06	474.15	668.95	1030.75	1446.54	1300.62		44918.7	0	0	0.79	11.76	1.333	1.51	1582.72	10814.3	<****	0	<****	<****	<****		0.146355
SHCR11_6	0.935	1.04	77250.7		21.09	40.74	30.71	33.55		93.59	16.73	249.15	442.12	737.85	1173.62	1658.34	2360.32	3170.12	2657.95		46214.7	0	0	0	24.64	1.731	2.33	4235.81	24342	<****	0	<****	<****	<****		0.174012
SHCR11_7c	0.935	0.0588	69609.4		2.178	22.4	4.4	12.21		60.94	24.63	232.1	370.83	689	957.23	1338.11	1897.34	2551.89	2031.87		44355.7	0	0	0	14.88	1.146	1.435	2057.16	14115.7	<****	0	<****	<****	<****		0.145736
SHCR11_9c	0.935	0.0179	75431.7		18.89	36.63	34.5	31.24		124.03	19.53	265.15	431.36	739.56	1072.78	1520.82	2230.04	2951.15	2328.66		40477.5	0	0	0	20.09	1.483	1.98	3090.34	19770.2	<****	0	<****	<****	<****		0.156313
SHCR12_10	0.935	0	97816.6		0.245	10.76	1.845	7.97		44.26	23.8	170.94	292.21	502.95	769.1	1085.28	1561.19	1911.95	1888.86		40464.2	0	0	0	15.91	1.11	1.63	3042.39	16133.7	<****	0	<****	<****	<****		0.188574
SHCR12_11	0.935	0.0092	99714.6		0	13.19	0	1.43		9.99	4.07	38.35	85.68	163.26	288.97	447.16	741.26	938.17	1019		51336.6	0	0	0	4.39	0.394	0.353	614.02	4644.81	<****	0	<****	<****	<****		0.132195
SHCR12_12	0.935	0.028	96231.6		1.342	20.17	3.81	8.23		45.05	17.25	149.38	254.33	421.62	703.21	1047.58	1501.87	1797.46	1918.5		51523.8	0	0	1.27	6.06	0.86	1.03	1345.11	6022.17	<****	0	<****	<****	<****		0.22336
SHCR12_2	0.935	0.0056	89902.4		2.12	15.65	2.19	4.23		21.23	8.61	76.84	141.87	262.99	413.12	606.51	990.88	1299.21	1212.28		43171.6	0	0	0.95	5.31	0.487	0.611	838.65	5260.19	<****	0	<****	<****	<****		0.159433
SHCR12_3	0.935	0	96391.3		0	10.88	0.164	0.929		6.58	4.2	39.2	78.51	156.59	253.65	387.68	614.17	845.33	828.88		46047.6	0	0	0	3.18	0.353	0.397	420.23	3141.73	<****	0	<****	<****	<****		0.133758
SHCR12_4	0.935	0.036	88846.5		0.343	21.77	1.945	4.97		36.92	10.24	134.74	244.18	436.72	688.6	1051.82	1544.05	1886.36	2042.55		46836.4	0	0	0	10.64	0.735	1.08	2040.65	11064.7	<****	0	<****	<****	<****		0.184429
SHCR12_5	0.935	0	93110.4		0.123	8.4	0.591	1.595		8.86	4.57	43.89	85.34	154.59	254.42	361.09	588.26	780.11	778.24		45108.8	0	0	0	4.24	0.346	0.309	489.03	4199.47	<****	0	<****	<****	<****		0.11645
SHCR12_6	0.935	0.006	80309.3		0.036	13.67	2.37	7.65		37.06	22.01	160.06	256.01	474.66	706.1	985.27	1372.95	1783.52	1640.24		41479.3	0	0	0	7.84	0.71	0.86	1274.38	7749.55	<****	0	<****	<****	<****		0.164446
SHCR12_8	0.935	0.026	90060.6		0.145	13.15	0.34	1.342		7.17	2.96	39.82	87.67	157.35	272.59	424.53	656.85	887.25	863.82		50922.2	0	0	1.47	4.61	0.581	0.58	532.77	4465.97	<****	0	<****	<****	<****		0.119295
SHCR12_9	0.935	0.028	93021.4		0.313	14.8	0.16	1.709		9.54	4.82	52.11	103.97	181.83	310.41	463.53	725.69	963.88	996.63		51483.3	0	0	0	5.15	0.62	0.713	675.35	4892.63	<****	0	<****	<****	<****		0.138034	0.151915
mean	0.935	0.0763937	76735.1		21.0369	34.125	23.4545	24.2469		43.9544	15.5225	119.768	197.62	350.754	535.788	782.585	1201.04	1643.63	1466.53		44840.9	0	0	0.355625	9.83719	0.942063	1.11916	1535.62	10194.5	#DIV/0!	0	#DIV/0!	#DIV/0!	#DIV/0!
intersample stdev	4.51195e-16	0.18758	11988.6		73.823	61.3975	76.9236	68.9808		49.5019	14.0662	73.5063	107.285	179.326	256.152	356.652	496.446	685.462	520.143		4581.6	0	0	0.569918	9.26211	0.683449	0.726446	1181.31	9045.71	#DIV/0!	0	#DIV/0!	#DIV/0!	#DIV/0!
Me

## Sheet: WMG1
Element	Si29	Ti49	Zr91		La139	Ce140	Pr141	Nd146		Sm147	Eu153	Gd157	Tb159	Dy163	Ho165	Er167	Tm169	Yb172	Lu175		Hf178	Hg202	Hg201	Pb204	Pb206	Pb207	Pb208	Th232	U238	Pm147	Hg204	Po208	U232	Pu238		Th/U
WMG11_1c	0.935	0	74639.9		8.89	24.57	20.36	30.16		81.68	24.07	198.55	260.62	398.22	559.37	806.87	1253.09	1865.83	1767.26		63659.7	0	0	0	29.88	2.16	1.3	1879.07	27488.6	<****	0	<****	<****	<****		0.0683582
WMG11_5c	0.935	0.0149	69664.1		5.06	48.23	9.71	19.04		79.12	15.04	237.46	419.13	758.85	1139.26	1629.45	2590.4	3369.82	2925.68		47244.9	0	0	0	43.24	2.99	4.56	7148.92	39995.4	<****	0	<****	<****	<****		0.178743
WMG12_11	0.935	0.0098	85185.4		354.22	335.34	363.64	360.59		253.57	63.4	257.75	246.53	412.23	529.38	680.39	1147.2	1449.56	1303.5		51199.2	0	0	0.55	8.77	0.656	0.8	1414.63	9331.33	<****	0	<****	<****	<****		0.1516
WMG12_12	0.935	0.0045	82955.7		7.64	86.36	21.77	26.22		61.07	22.27	154.05	239.91	380.69	556.67	723.76	1082.46	1412.43	1221.5		46748.4	0	0	0	5.61	0.653	0.711	830.69	5746.7	<****	0	<****	<****	<****		0.144551
WMG12_15	0.935	0.045	81301.4		23.16	102.01	52.26	67.05		171.04	80.94	405.02	572.46	881.23	1101.29	1262.53	1622.5	2075.38	1494.46		39861.1	0	0	0	5.57	0.932	1.07	1452.17	6164.53	<****	0	<****	<****	<****		0.235569
WMG12_16	0.935	0.0233	86116.5		34.62	42.12	30.37	30.82		44.59	12.03	98.57	162.79	302.52	459.78	689.01	1051.57	1346.51	1219.47		43803.1	0	0	0	6.69	0.629	0.812	1169.89	6854.52	<****	0	<****	<****	<****		0.170674
WMG12_17	0.935	0.0174	76926.4		0.659	10.29	1.653	6.85		39.09	25.25	142.84	223.61	369.85	571.89	736.63	1150.81	1389.36	1278.13		35475.7	0	0	0	4.97	0.491	0.603	828.56	5165.1	<****	0	<****	<****	<****		0.160415
WMG12_18	0.935	0.0101	76576.2		0.257	22.23	0.968	3.33		24.65	10.66	103.44	186.76	329.86	537.43	792.28	1115.28	1503.59	1285.76		45095.7	0	0	0.54	10.65	0.869	0.864	1357.92	10900.2	<****	0	<****	<****	<****		0.124578
WMG12_1c	0.935	0.236	80349.8		548.82	574.85	624.11	634.62		573.83	124.05	827.25	966.68	1394.71	1906.32	2450.5	3348.33	4102.73	3554.61		39966.6	0	0	0.79	21.85	1.61	2.71	4885.05	23007.6	<****	0	<****	<****	<****		0.212324
WMG12_22	0.935	0	87615.4		3.78	34.4	7.3	14.37		45.38	15.28	145.86	243.3	425.82	662.87	1002.03	1636.16	2373.74	2164.27		62238.8	0	0	0	29.35	1.99	1.82	3562.2	31465.4	<****	0	<****	<****	<****		0.11321
WMG12_23	0.935	0.0251	84249.7		5.96	78.08	16.85	28.91		91.65	17.47	261.39	453.42	800.66	1200.98	1764.17	2508.61	3522.85	3114.51		53664.2	0	0	0.52	32.2	3.05	3.42	5007.76	32730.7	<****	0	<****	<****	<****		0.152999
WMG12_25	0.935	0.248	82222.1		105.98	165.83	158.67	201.29		339.7	97.4	633.37	914.22	1417.74	1949.53	2404.28	3576.95	4968.04	4095.59		59128.7	0	0	1.46	67.76	5.11	6.07	12954.4	70308.3	<****	0	<****	<****	<****		0.184252
WMG12_26c	0.935	0.0119	80914.3		123.34	149.78	156.03	143.66		150.07	68.88	275.39	411.25	633.03	949.33	1309.33	1821.46	2257.93	1878.44		37471.1	0	0	0	15.62	1.07	2.4	4738.12	16546	<****	0	<****	<****	<****		0.286361
WMG12_27	0.935	0.0067	86690.5		33.88	52.85	39.79	45.61		109.77	29.46	301.56	476.2	760.49	1215.64	1672.69	2453.36	2948.77	2655.81		49340.2	0	0	0	15.4	1.04	1.59	2957.82	15683.7	<****	0	<****	<****	<****		0.188592
WMG12_29	0.935	0.047	76408.6		13.03	120.76	22.76	40.99		155.51	26.09	549	951.84	1691.44	2632.98	3669.87	5771.65	7208.06	6346.41		45674.6	0	0	0	61.82	4.01	8.26	15675	59973.5	<****	0	<****	<****	<****		0.261365
WMG12_2r	0.935	0.136	82165.5		1.334	18.77	2.021	4.69		24.87	6.51	99.33	186.01	322.37	515.57	759.54	1110.43	1437.39	1394.39		47109.9	0	0	0	5.65	0.557	0.694	983.91	6011.75	<****	0	<****	<****	<****		0.163664
WMG12_3	0.935	0.0163	79409.4		0.07	6.26	1.137	4.2		26.08	20.14	119.64	192.43	343.07	482.72	713.56	1005.36	1293.21	1186.34		39704.9	0	0	0	3.85	0.286	0.307	521.49	4037.83	<****	0	<****	<****	<****		0.129151
WMG12_33	0.935	0.0257	80788.4		0.575	29.2	2.67	8.88		54.84	12.31	190.61	367.33	591.4	963.15	1311.89	2009.52	2577.59	2083.12		47965.7	0	0	0	19.47	1.29	1.86	3568.83	19670.8	<****	0	<****	<****	<****		0.181428
WMG12_35c	0.935	0.039	89205.1		0.162	15.45	0.639	2.052		18.27	5.58	68.65	137.07	248.57	378	572.95	883.08	1232.1	1056.15		47141.2	0	0	0.76	7.61	0.869	0.85	915.59	7437.87	<****	0	<****	<****	<****		0.123098
WMG12_36	0.935	0.0195	97219.7		0.22	17.1	0.582	1.855		6.66	2.91	50.59	92.55	188.52	302.14	483.86	740.13	954.34	1053.33		54861.8	0	0	0	5.22	0.578	0.531	598.91	5016.89	<****	0	<****	<****	<****		0.119379
WMG12_37	0.935	0.039	96393.3		2.78	27.23	6.42	11.13		28.7	9.77	111.08	164.23	314.43	472.18	795.22	1226.84	1607.97	1578.88		58642.7	0	0	1	23.99	1.8	1.63	2768.62	23783.7	<****	0	<****	<****	<****		0.116408
WMG12_5	0.935	0.045	80289.7		3.01	16.46	1.722	2.63		10.31	2.11	34.58	67.54	133.74	235.78	323.5	517.96	694.71	695.88		42637	0	0	0	4.08	0.368	0.365	436.55	4156.04	<****	0	<****	<****	<****		0.10504
WMG12_7c	0.935	0.041	80426.9		0.286	23.25	2.65	8.03		47.45	19.4	185.86	328.62	580.15	877.74	1153.15	1766.03	2236.92	1938.79		47566.7	0	0	1.2	13.76	1.88	2.36	1992.57	13425.5	<****	0	<****	<****	<****		0.148417
WMG12_8c	0.935	0.078	79624.2		1.595	81.14	7.25	11.92		54.91	3.26	215.82	457.74	970.35	1738.54	3013.41	5391.85	7921.33	7264.12		42500.3	0	0	0	97.24	6.29	9.44	17124.8	97235.2	<****	0	<****	<****	<****		0.176117
WMG12_9c	0.935	0.0255	74631.1		11.15	160.36	25.24	35.15		91.41	19.96	312.31	558.94	1142.42	1934.26	2781.38	5200.89	6932.17	5833.09		57790	0	0	0	109.31	7.35	12.26	22632.6	108238	<****	0	<****	<****	<****		0.2091	0.164216
mean	0.935	0.046588	82078.8		51.6191	89.7168	63.0629	69.7619		103.369	29.3696	239.199	371.247	631.694	954.912	1340.09	2079.28	2747.29	2415.58		48259.7	0	0	0.2728	25.9824	1.94112	2.69148	4696.24	26015	#DIV/0!	0	#DIV/0!	#DIV/0!	#DIV/0!
intersample stdev	2.26623e-16	0.0653708	6284.65		127.462	125.01	141.374	142.335		125.886	31.9082	189.703	257.207	417.002	630.681	884.378	1489.38	2016.06	1757.16		7724.59	0	0	0.446155	28.9931	1.8978	3.12234	5954.03	28788.1	#DIV/0!	0	#DIV/0!	#DIV/0!	#DIV/0!

## Sheet: BFB1
Element	Si29	Ti49	Zr91		La139	Ce140	Pr141	Nd146		Sm147	Eu153	Gd157	Tb159	Dy163	Ho165	Er167	Tm169	Yb172	Lu175		Hf178	Hg202	Hg201	Pb204	Pb206	Pb207	Pb208	Th232	U238	Pm147	Hg204	Po208	U232	Pu238		Th/U
BFB1_1	0.935	0.015	66865.4		0.134	23.86	0.88	3.06		19.63	8.32	58.95	107.64	187.74	270.38	392.59	625.32	866.05	772.56		35451.2	0	0	0	3.16	0.458	0.617	625.7	3237.24	<****	0	<****	<****	<****		0.193282
BFB1_10	0.935	0.027	66126.5		15.53	44.42	18.7	23.6		57.18	20.47	140.47	207.84	349.89	501.73	627.26	975.39	1437.68	1100.22		33392.7	0	0	0	3.49	0.336	0.601	913.69	4165.66	<****	0	<****	<****	<****		0.219339
BFB1_11	0.935	0.0208	64300.2		1.475	30.41	5.44	13.15		61.55	24.21	162.64	238.53	404.72	545.82	795.49	1134.37	1515.23	1279		34605.4	0	0	0	4.86	0.486	0.934	1462.23	5447.97	<****	0	<****	<****	<****		0.268399
BFB1_12	0.935	0.0201	61281.2		0.19	28.24	6.88	18.46		79.8	32.52	194.52	295.34	462.8	602.62	817.06	1173.01	1580.67	1351.02		31554.9	0	0	0	3.97	0.369	0.726	1148.92	4619.97	<****	0	<****	<****	<****		0.248686
BFB1_13	0.935	0.0221	63418		0.218	33.73	2.05	5.12		30.58	10.87	91.46	153.82	279.44	416.31	599.75	918.53	1332.69	1087.48		37255.7	0	0	0	8.17	0.643	0.959	1649.9	9637.7	<****	0	<****	<****	<****		0.171192
BFB1_14	0.935	0.0289	61676.7		0.67	24.35	5.05	14.01		57.42	25.8	146.85	217.75	360.06	526.13	699.77	1012.32	1391.23	1090.77		29193.6	0	0	0	3.99	0.418	0.678	979.9	4615.12	<****	0	<****	<****	<****		0.212324
BFB1_16	0.935	0.0237	62657.2		30.71	54.13	29.53	32.28		47.61	18.42	116.66	186.98	305.3	414.82	602.18	889.01	1277.18	1025.9		29980	0	0	0.98	4.77	0.966	1.293	1108.59	5042.83	<****	0	<****	<****	<****		0.219835
BFB1_17	0.935	0.0267	65225.3		0.69	26.35	4.06	11.06		53.56	20.99	144.19	221.7	372.86	516.41	699.12	1028.82	1363.75	1253.72		34607.7	0	0	1.39	4.33	0.867	1.189	1111.05	4054.05	<****	0	<****	<****	<****		0.274059
BFB1_19	0.935	0.0234	59686.2		0.532	29.04	7.43	21.97		82.07	29.72	205.18	318.6	535.15	696.5	937.29	1326.27	1896.36	1539.78		28878.6	0	0	0	4.81	0.376	0.815	1384.81	5622.47	<****	0	<****	<****	<****		0.246299
BFB1_2	0.935	0.0078	64822.2		0.0613	30.6	1.164	3.87		22.37	8.25	73.11	130.39	237.38	367.28	535.15	819.28	1210.42	1047.44		42013.2	0	0	0.54	7.98	1.036	1.255	1365.21	8628.5	<****	0	<****	<****	<****		0.158221
BFB1_20	0.935	0.0311	62345.8		0	18.43	1.037	3.84		19.47	10.25	63.52	115.28	183.32	258.24	366	600.36	863.99	693.27		26788.1	0	0	0	2.41	0.183	0.293	501.83	2867.19	<****	0	<****	<****	<****		0.175025
BFB1_22	0.935	0.042	61023.1		0.809	27.18	3.05	9.75		40.36	18.32	123.05	198.02	353.04	469.04	650.19	979.87	1405.17	1184.02		29104.6	0	0	0	4.27	0.337	0.652	1151.5	5034.81	<****	0	<****	<****	<****		0.228708
BFB1_24	0.935	0.0274	63945.9		0.062	22.12	1.87	6.8		30.05	12.82	96.7	160.63	268.76	397.12	615.14	922.35	1264.48	1202.49		32564.8	0	0	0	3.89	0.341	0.454	757.98	4488.13	<****	0	<****	<****	<****		0.168885
BFB1_25	0.935	0.0289	65092.3		0.125	20.15	1.503	5.35		26.53	13.47	82.62	139.4	244.09	343.55	457.42	742.39	981.86	902.57		32763.4	0	0	0	2.69	0.319	0.457	645.21	3048.12	<****	0	<****	<****	<****		0.211675
BFB1_26	0.935	0.0245	67643.8		0.0386	24.22	1.5	4.83		22.23	10.05	75.3	121.26	217.24	328.77	474.31	691.43	998.45	876.38		35553.6	0	0	0	3.48	0.338	0.49	783.02	4000.74	<****	0	<****	<****	<****		0.195719
BFB1_27	0.935	0.0335	61835.2		0.0594	23.75	1.79	5.57		31.38	12.39	91.44	140.62	244.7	385.06	546.21	895.05	1221.29	1139.51		33550.9	0	0	0	4.54	0.369	0.537	920.84	5307.55	<****	0	<****	<****	<****		0.173496
BFB1_28	0.935	0.0235	66040.5		0.069	23.06	1.62	5.02		26.52	11.84	87.03	146.32	241	343.93	498.87	776.29	1022.62	930.73		34610.4	0	0	0	3.16	0.303	0.479	762.74	3632.17	<****	0	<****	<****	<****		0.209996
BFB1_29	0.935	0.0265	64221.3		49.66	59.64	36.54	37.03		52.48	19.08	104	164.58	271.08	388.74	523.1	814.77	1155.8	1059.51		32165.9	0	0	0	3.05	0.267	0.439	763.16	3545.94	<****	0	<****	<****	<****		0.215221
BFB1_3	0.935	0.0349	68572.8		0.0528	22.95	1.017	3.79		25.5	10.04	73.43	115.76	201.61	307.61	423.15	661.46	946.37	857.69		35967.3	0	0	0	3.48	0.578	0.731	693.9	3437.62	<****	0	<****	<****	<****		0.201855
BFB1_30	0.935	0.031	55535.5		0.148	21.08	1.87	5.14		28.45	12.55	81.42	129.43	238.97	323.28	450.67	714.23	1056.22	930.65		30105.7	0	0	0	2.77	0.267	0.375	594.02	3302.53	<****	0	<****	<****	<****		0.179868
BFB1_31	0.935	0.0357	61443.7		1.692	28.38	4.79	11.23		45.68	20.89	130.05	210.14	364.01	518.95	730.06	1085.82	1491.71	1264.72		32964.8	0	0	0	4.42	0.424	0.735	1231.9	5304.83	<****	0	<****	<****	<****		0.232222
BFB1_32	0.935	0.0319	61458		0.086	23.38	1.94	6.3		29.52	14.55	93.25	151.48	248.36	371.81	502.84	756.53	1077.22	919.42		32682.7	0	0	0	3.16	0.326	0.538	803.36	3735.01	<****	0	<****	<****	<****		0.215089
BFB1_33	0.935	0.0195	57504.5		0.103	21.16	1.549	5.42		27.75	11.64	80.41	130.65	218.63	321.28	462.07	682.11	1011.73	846.4		30701.1	0	0	0	3.06	0.284	0.433	703.66	3608.55	<****	0	<****	<****	<****		0.194998
BFB1_35	0.935	0.0254	60944.8		0.24	31.7	6.36	20.05		86.56	33.69	211.41	328.71	523.99	739.67	932.93	1383.36	1945.09	1555.34		33493.2	0	0	0	4.66	0.394	0.813	1458.46	5592.54	<****	0	<****	<****	<****		0.260787
BFB1_36	0.935	0.0355	63547.7		0.452	26.78	5.76	14.43		60.68	26.25	167.87	267.54	455.38	623.24	835.79	1247.84	1707.81	1500.51		32324.5	0	0	0	4.96	0.36	0.729	1370.38	6074.4	<****	0	<****	<****	<****		0.225599
BFB1_38	0.935	0.0207	58351		0.115	20.47	2.8	9.28		42.65	18.05	119.33	182.91	298.21	445.38	564.29	889.55	1253.57	987.2		28508.5	0	0	0	3.05	0.303	0.523	787.11	3772.9	<****	0	<****	<****	<****		0.208622
BFB1_39	0.935	0.027	57432.7		0.099	23.65	2.46	7.45		33.68	13.44	88.05	160.86	272.78	415.83	604.84	925.82	1526.66	1219.2		27174.2	0	0	0	4.94	0.351	0.482	877.48	5840.53	<****	0	<****	<****	<****		0.15024
BFB1_40	0.935	0.0213	61367.9		0.291	26.81	4.09	11.55		47.81	22.28	129.38	203.7	369.9	470.58	685.23	1041.62	1395.4	1174.43		30192.2	0	0	0	3.87	0.431	0.634	1006.18	4627.55	<****	0	<****	<****	<****		0.217433
BFB1_41	0.935	0.0259	58290.5		0.069	20.32	1.019	3.83		21.14	9.87	73.51	114.68	211.06	287.02	434.92	640.11	915.14	771.54		31794.7	0	0	0	2.39	0.252	0.364	513.2	2852.39	<****	0	<****	<****	<****		0.179919
BFB1_42	0.935	0.0316	58928.1		0.259	26.21	2.81	7.74		35.01	14.12	100.28	167.09	286.3	428.82	606.18	917.96	1349.47	1165.68		29649	0	0	0	5.08	0.436	0.786	1386.73	6176.4	<****	0	<****	<****	<****		0.224521
BFB1_43	0.935	0.0285	58156.1		43.34	88.67	52.61	63.97		98.65	36.53	199.89	302.89	501.9	694.42	930.24	1368.65	2006.83	1749.69		30509.4	0	0	0	5.7	0.521	1.034	1745.93	6857.67	<****	0	<****	<****	<****		0.254595
BFB1_44	0.935	0.0284	64339.1		617.88	528.44	530.75	447.22		274.11	61.21	234.24	258.49	396.5	533.93	662.87	1098.46	1461.52	1339.62		30398.6	0	0	0	5.21	0.448	0.79	1342.2	6253.43	<****	0	<****	<****	<****		0.214634
BFB1_46	0.935	0.023	56509.9		0	20.04	1.234	3.71		22.28	10.51	73.21	119.59	219.15	310.35	409.84	644.27	955.04	759.73		30850.8	0	0	0	2.54	0.229	0.392	596.11	3087.86	<****	0	<****	<****	<****		0.19305
BFB1_47	0.935	0.0344	58831		34.55	56.34	31.31	35.27		88.03	33.64	203.18	307.89	532.4	676.97	930.36	1349.87	1932.08	1611.67		29545.4	0	0	0	4.97	0.448	0.952	1654.83	6095.19	<****	0	<****	<****	<****		0.271498
BFB1_48	0.935	0.0271	60281.3		0.336	27.06	5.72	15.04		63.77	27.93	159.02	248.78	412.31	554.4	767.41	1163.17	1564.48	1270.44		31875.1	0	0	0	3.71	0.396	0.697	1062.95	4403.31	<****	0	<****	<****	<****		0.241398
BFB1_49	0.935	0.023	58289.5		0.07	25.01	1.355	4.29		23.41	10.73	73.05	125.69	220.9	296.44	434.26	706.39	1001.83	805.94		30520.8	0	0	0	3.35	0.316	0.522	822.85	4109.87	<****	0	<****	<****	<****		0.200213
BFB1_5	0.935	0.0437	65013		79.82	73.91	70.27	61.52		91.19	29.51	192	286.94	448.37	650.39	819.59	1264.44	1712.18	1478.42		31809.9	0	0	0.64	4.94	0.876	1.273	1296.34	4987.47	<****	0	<****	<****	<****		0.259919
BFB1_50	0.935	0.0378	55006.8		0.438	26.58	6.39	15.62		69.71	29.66	189.37	297.1	507.13	652.4	894	1341.64	1794.49	1541.04		27029.1	0	0	0	5.04	0.429	0.809	1429.67	6154.48	<****	0	<****	<****	<****		0.232297
BFB1_6	0.935	0.0111	64782.7		0.378	35.06	3.67	11.6		63.11	23.43	177.4	295.2	514.83	718.12	1012.65	1486.03	2006.9	1650.55		40593.8	0	0	0	9.08	0.701	1.298	2370.47	10421.6	<****	0	<****	<****	<****		0.227457
BFB1_9	0.935	0.0362	65620.3		0.236	24.99	4.67	12.78		55.15	21.66	155.76	231.89	379.37	532.44	744.61	1016.98	1486.46	1275.79		31280.9	0	0	0	4.27	0.378	0.68	1104.23	4949.58	<****	0	<****	<****	<****		0.223096	0.214992
mean	0.935	0.028684	60892.2		33.2177	52.2176	31.3758	32.994		57.7688	21.4196	131.519	203.557	343.154	479.642	656.279	994.897	1399.92	1192.22		31612	0	0	0.0256	4.216	0.40348	0.6818	1091.95	4965.26	#DIV/0!	0	#DIV/0!	#DIV/0!	#DIV/0!
intersample stdev	2.26623e-16	0.00710497	3615.21		123.508	100.798	105.548	87.8766		50.9139	11.7977	52.4513	72.1973	115.923	149.396	191.567	270.286	362.625	301.902		2798.79	0	0	0.128	1.39909	0.145532	0.255411	437.922	1640.75	#DIV/0!	0	#DIV/0!	#DIV/0!	#DIV/0!

## Sheet: QM1
Element	Si29	Ti49	Zr91		La139	Ce140	Pr141	Nd146		Sm147	Eu153	Gd157	Tb159	Dy163	Ho165	Er167	Tm169	Yb172	Lu175		Hf178	Hg202	Hg201	Pb204	Pb206	Pb207	Pb208	Th232	U238	Pm147	Hg204	Po208	U232	Pu238		Th/U
QM12_1	0.935	0	86728.2		0.253	29.98	3.06	9.07		63.06	19.86	229.92	396.76	691.42	1145.01	1641.96	2215.34	2689.49	2629.56		49479.2	0	0	0	21.26	1.36	1.85	3638.31	21582.7	<****	0	<****	<****	<****		0.168575
QM12_11	0.935	0.0072	96679.8		0.966	33.8	1.359	3.55		27.36	6.62	134.75	270.7	461.15	810.47	1173.79	1740.62	2269.13	2099.91		65037.8	0	0	1.41	26	2.31	2.45	3452.4	26900.2	<****	0	<****	<****	<****		0.128341
QM12_12	0.935	0	100871		33.94	82.3	68.17	87.36		253.35	35.04	515.57	766.37	1058.2	1424.36	1808.35	2660.14	3185.26	3398.06		79216.9	0	0	0	37.06	2.46	2.72	7257.99	38094.7	<****	0	<****	<****	<****		0.190525
QM12_13	0.935	0	94902.4		5.19	46.13	8.64	13.49		66.6	18.21	257.33	440.61	817.85	1302.6	1750.89	2722.33	3293.23	3059.02		58333.4	0	0	0	28.43	2.1	2.88	5278.92	28926.4	<****	0	<****	<****	<****		0.182495
QM12_14	0.935	0	91319.5		22.22	44.77	24.74	33.2		94.36	36.47	337.53	571.15	919.04	1315.45	1736.22	2412.38	2713.99	2427.72		43930.4	0	0	0	15.86	1.08	1.2	2320.33	16489	<****	0	<****	<****	<****		0.14072
QM12_15	0.935	0.0159	97608.9		13.65	53.41	14.89	15.19		54.39	11.48	228.92	421.27	772.71	1267.45	1792.78	2456.13	3239.59	3014.47		65519.3	0	0	0	31.28	2.04	2.52	4991.16	31992.8	<****	0	<****	<****	<****		0.156009
QM12_17	0.935	0.0042	97646.8		408.55	373.81	325.21	260.73		260.02	22.79	393.65	659.03	1066.28	1489.74	2152.33	3155.59	3725.93	3757.96		58227.1	0	0	0	35.9	2.47	3.38	6386.14	36010.5	<****	0	<****	<****	<****		0.177341
QM12_18	0.935	0.103	94025.1		15069.7	15446	13410.2	10745.5		6923.98	269.03	4180.11	4013.55	4011.87	4425.15	4971.1	5215.08	5690.89	5050.48		107015	0	0	2.23	32.6	3.19	12.5	27260	31722.9	<****	0	<****	<****	<****		0.859318
QM12_19	0.935	0.0141	100170		5.15	37.52	12.09	14.41		64.03	17.2	254.89	441.4	782.43	1308.91	1676.13	2591.29	3049.88	3078.5		60666.5	0	0	0	23.64	1.62	1.93	3753.78	24056	<****	0	<****	<****	<****		0.156044
QM12_2	0.935	0	93654.9		212.2	223.92	208.57	209.79		206.06	23.41	292.2	398.48	646.19	958.09	1288.68	2113.9	2626.29	2284.82		59335.4	0	0	0.73	26.55	1.71	1.96	3802.45	27478	<****	0	<****	<****	<****		0.138382
QM12_21	0.935	0.0143	90096.1		1.069	34.49	3.99	9.56		58.94	9.96	206.08	394.15	648.22	1107.06	1598.76	2284.5	2830.57	2782.33		64111.6	0	0	0.74	27.36	2.36	2.55	3847	27011.7	<****	0	<****	<****	<****		0.14242
QM12_22	0.935	214.34	824.72		5209.69	3985.41	2599.38	1441.78		587.86	1928.99	390.9	292.92	310.67	321.86	319	408.74	387.92	272.87		635.45	0	0	0	8.67	0.8	8	16623.8	9214.54	<****	0	<****	<****	<****		1.80408
QM12_24	0.935	0	92769.7		7.1	51.85	7.5	15.66		72.78	19.29	305.67	553.3	967.17	1458.33	2168.36	3130.56	3806.99	3716.79		54872.7	0	0	0	33.44	2.1	3.07	6205.85	33648.1	<****	0	<****	<****	<****		0.184434
QM12_26	0.935	0.22	104876		313.63	331.66	298.76	183.58		160.84	16.43	270.94	427.94	768.23	1207.13	1793.52	2505.68	3149.9	2960.29		62494.3	0	0	0	39.2	2.8	3.9	6511.58	39273.8	<****	0	<****	<****	<****		0.1658
QM12_27	0.935	0.023	95606.9		3197.6	3536.29	3019.95	2592.31		2416.72	84.95	2130.37	2581.87	2672.87	3489.19	4152.86	4788.92	5677.59	4869.44		60629.1	0	0	0.56	35.9	2.53	6.05	12495.1	36029.9	<****	0	<****	<****	<****		0.346799
QM12_28	0.935	0.0098	105206		15.5	53.46	13.21	14.9		68.76	17.7	264.41	467.89	895.12	1359.4	1946.84	2712.34	3462.52	3473.14		57507.5	0	0	0	30.17	2.07	2.84	5548.12	30758.3	<****	0	<****	<****	<****		0.180378
QM12_29	0.935	0.0199	95835.8		6.31	34.49	8.72	10.44		61.35	12.03	261.9	324.8	629.65	964.57	1285.26	2097.47	2608.96	2574.34		69896.6	0	0	1.16	35.49	3.61	3.31	3816.69	35288.2	<****	0	<****	<****	<****		0.108158
QM12_3	0.935	0.0128	87726.3		189.6	212.05	180.85	188.64		233.3	29.84	383.58	579.51	989.2	1497.74	1987.79	2763.23	3737.12	3236.65		53041.3	0	0	0	28.85	1.86	2.53	5056.96	29609.9	<****	0	<****	<****	<****		0.170786
QM12_30	0.935	0	96727.8		0.284	34.86	1.717	7.43		75.15	9.18	241.8	450.94	818.76	1216.58	1853.57	2472.1	3461.85	3011.17		65597.4	0	0	0	28.92	1.94	2.13	4215.2	29758	<****	0	<****	<****	<****		0.141649
QM12_4	0.935	0.0125	99383		0.533	27.56	2.5	5.95		39.52	10.09	187.51	362.69	672.85	1094.08	1630.48	2476.88	3019.29	2854.82		62221.2	0	0	0	29.12	1.91	1.95	3758	29895.6	<****	0	<****	<****	<****		0.125704
QM12_5	0.935	0.108	99872.8		165.98	181.24	141.51	107.18		187.79	26.99	487.79	1003.08	1469.74	1965.31	2763.14	3915.48	4315.84	4004.95		61643.6	0	0	0	25.65	1.94	2.43	6103.08	27691.7	<****	0	<****	<****	<****		0.220394
QM12_6	0.935	0.0169	93702.5		1.92	33.44	3.98	11.41		72.01	13.94	281.33	495.63	882.11	1431.36	2057.87	2783.71	3376.79	3133.22		58538.2	0	0	0	27.63	1.87	2.37	4738.42	27999	<****	0	<****	<****	<****		0.169236
QM12_7	0.93	0	247.49		0	26.44	75.99	0		0	0	0	0	0	0	105.36	0	0	155.04		105.13	0	0	42.6	1.85	1.18	0	0	0	<****	0	<****	<****	<****		0
QM12_8	0.935	0	94559.2		51.73	75.59	45.67	44.26		94.62	18.59	325.11	581.28	1046.11	1646.85	2282.53	3315.69	4037.93	3771.79		58359.9	0	0	0	32.17	2.24	2.9	5664.85	32084.7	<****	0	<****	<****	<****		0.176559
QM1-10	0.935	0	64129.8		0.759	13.8	1.66	5.7		28.79	20.3	121.54	204.99	357.61	568.39	744.29	1009.7	1452.85	1234.82		45127.9	0	<****	0.71	8.93	0.655	0.615	992.27	9209.06	<****	0	<****	<****	<****		0.107749
QM1-11	0.93	1.34	117.77		8.28	1.14	0	0		0	0	314.16	85.87	0	216.73	159.64	0	0	347.73		24.75	0	<****	0	0	0	0	<****	0	<****	0	<****	<****	<****		0
QM1-14	0.935	0	58358.3		15.57	59.65	16.19	20.86		57.09	12.74	200.28	366.34	677.2	1043.85	1547.84	2256.45	2886.76	2544.8		47137.6	0	<****	0	36.22	2.4	3.7	6639.14	38330.1	<****	0	<****	<****	<****		0.17321
QM1-16	0.93	0	553.41		19.92	10.49	19.56	34.74		72.06	101.46	66.34	18.02	67.98	25.34	55.26	87.12	78.74	149.41		22.64	0	<****	0	0	11.16	6.29	0	0	<****	0	<****	<****	<****		0
QM1-1c	0.935	0.0134	65141.6		2.65	29.87	7.34	12.43		56.28	9.41	205.98	381.56	679.81	997.46	1509.27	2193.41	3040.58	3037.04		71769.4	0	<****	1.16	29.57	2.52	2.54	4576.86	30674.6	<****	0	<****	<****	<****		0.149207
QM1-2	0.93	0	0		35.88	17.49	32.53	61.33		175.53	108.53	143.9	31.89	0	40.6	52.84	103.78	71.23	235.33		81.26	0	<****	0	11.79	0	10.12	0	731.34	<****	0	<****	<****	<****		0
QM1-4	0.935	0	64630.3		3.49	27.18	52.19	142.76		855.09	44.62	2112.88	2380.08	2853.28	3197.96	3404.33	4072.38	4598.99	4317.87		61335.2	0	<****	0	19.59	1.39	1.76	3312.1	20476.9	<****	0	<****	<****	<****		0.161748
QM1-5	0.935	0	1.51		7.61	2.79	1.246	0.154		0	12.42	1.25	0	0	0	0	0	0	2.05		0	0	<****	2.88	3.47	3.36	3.49	0	0	<****	0	<****	<****	<****		0
QM1-6c	0.935	0.043	66903.1		2.78	32.57	6.74	14.17		76.22	15.06	282.85	510.57	928.59	1411.88	2003.68	2874.24	3797.92	3564.69		54947.1	0	<****	1.22	33.4	2.96	3.61	5866.15	34721.5	<****	0	<****	<****	<****		0.168949	0.21197
mean	0.9342	8.64751	66843.8		379.009	363.01	270.474	205.978		228.832	102.525	389.346	533.408	790.552	1141.15	1535.49	2118.3	2619.06	2464.56		45204.1	0	0	2.0704	23.1032	2.2794	3.2018	4730.31	22957.6	#DIV/0!	0	#DIV/0!	#DIV/0!	#DIV/0!
intersample stdev	0.00187083	42.8534	40445.5		1190	1027.9	770.453	573.445		494.048	381.605	533.409	628.419	706.536	869.927	1056.54	1367.78	1645.66	1475.01		26475.3	0	0	8.47046	12.4995	2.05593	2.30507	3763.19	13681.9	#DIV/0!	0	#DIV/0!	#DIV/0!	#DIV/0!

## Sheet: SAFT8
Element	Si29	Ti49	Zr91		La139	Ce140	Pr141	Nd146		Sm147	Eu153	Gd157	Tb159	Dy163	Ho165	Er167	Tm169	Yb172	Lu175		Hf178	Hg202	Hg201	Pb204	Pb206	Pb207	Pb208	Th232	U238	Pm147	Hg204	Po208	U232	Pu238		Th/U
SAFT8-1	0.935	0.0046	80336.7		0.0446	35.36	0.605	2.08		10.93	25.67	40.93	92.07	197.74	407.26	804.41	1680.77	2648.14	2482.15		26052.7	0	0	0	41.3	2.67	6.07	11390.5	39980.7	<****	0	<****	<****	<****		0.2849
SAFT8-10	0.935	0.0075	78045.6		2.71	106.54	2.92	5.88		25.01	44.59	91.22	179.96	393.86	731.94	1413.01	2630.37	3810.04	3517.15		21934.2	0	0	0	74.17	4.89	16.68	30102	68087.5	<****	0	<****	<****	<****		0.442108
SAFT8-11	0.935	0.102	82773.7		1.126	123.6	2.45	6.71		29.17	46.98	93.61	213.03	464.17	812.81	1527.54	2873.33	4666.12	3768.48		24254	0	0	0	80.87	5.13	17	29571.8	75142.4	<****	0	<****	<****	<****		0.393543
SAFT8-13	0.935	0.052	78649.3		26.64	197.88	18.42	21.26		47.65	69.71	133.34	261.98	561.39	1050.12	1913.24	3664.8	5505.11	4822.36		21640.4	0	0	0.79	114.68	7.81	34.57	87077.4	103609	<****	0	<****	<****	<****		0.840439
SAFT8-14	0.935	0.0137	82856.7		146.42	101.35	42.06	26.22		9.82	18.22	17.06	30.84	66.92	125.85	291.8	597.24	1056.52	1039.75		24267	0	0	0.79	30.38	2.61	5.5	12639.1	27021.4	<****	0	<****	<****	<****		0.467745
SAFT8-15	0.935	0.0214	82068.2		0.271	114.61	1.713	4.82		26.74	47.55	85.2	195.51	411.48	770.05	1455.84	2732.5	4267.43	3526.81		22636.2	0	0	0	82.91	5.44	16.43	28098.2	77113	<****	0	<****	<****	<****		0.364376
SAFT8-17	0.935	0.057	74734.5		0.0884	52.76	0.731	2.24		11.54	27.77	39.69	92.82	213.19	419.15	868.06	1688.17	3001.75	2601.19		26980.6	0	0	0	60.85	3.94	9.11	15475.9	58426.1	<****	0	<****	<****	<****		0.264879
SAFT8-18	0.935	0.135	77981.1		3.52	90.82	3.54	8.15		46.86	53.06	152.75	301.12	595.88	1022.85	1798.4	3147.77	5121.15	3937.7		21549.9	0	0	0	47.43	3.01	9.05	16111	43536	<****	0	<****	<****	<****		0.370062
SAFT8-19	0.935	0.0092	81893.2		1.152	69.2	1.567	3.3		15.43	28.03	46.19	106.11	229.85	442.74	890.54	1695.3	2857.9	2392.99		27112.9	0	0	0.28	84.28	5.33	17.04	29312.5	80263.1	<****	0	<****	<****	<****		0.365205
SAFT8-2	0.935	0.317	81387.8		83.03	50.08	16.81	15.64		11.14	29.22	14.71	20.37	41.58	85.15	184.98	470.21	945.24	1054.06		34972.7	0	0	0.38	40.58	2.88	6.09	14206.4	54227.7	<****	0	<****	<****	<****		0.261976
SAFT8-20	0.935	0.032	82359.6		0.908	77.03	1.439	3.57		16.28	32.98	59.3	126.41	270.72	507.59	1054.54	2056.76	3280.67	2843.93		24531.6	0	0	0	63.63	4.17	10.37	17058.2	62499.5	<****	0	<****	<****	<****		0.272934
SAFT8-21	0.935	0.0396	75576.1		0.463	34.89	0.873	1.79		9.25	20.57	32.44	66.87	162.99	332.65	668.78	1431.36	2584.55	2030.4		23660	0	0	0	37.98	2.38	5.21	8780.49	35264.9	<****	0	<****	<****	<****		0.248987
SAFT8-22	0.935	0.0333	82222.4		1.177	109.04	3.28	6.86		30.42	66.2	100.21	219.92	467.43	872.42	1605.23	3091.02	4857.35	4134.99		24907.1	0	0	0	82.4	5.19	16.42	28040.3	77369.4	<****	0	<****	<****	<****		0.362422
SAFT8-23	0.935	0.06	78975.7		4.27	101.44	5.9	8.44		24.74	44.9	82.24	168.65	370.78	691.55	1360.29	2282.76	4117.57	3306.3		23104.3	0	0	0	67.45	4.43	12.76	21893.5	65885	<****	0	<****	<****	<****		0.332299
SAFT8-24	0.935	0.021	81166		2.32	63.58	2.25	3.66		14.36	32.83	46.83	101.2	227.26	461.26	914.1	1697.36	3022.36	2406.12		26987	0	0	0	66.68	4.19	12.18	20477	62285.8	<****	0	<****	<****	<****		0.328758
SAFT8-26	0.935	0.055	76899.1		4.96	90.42	7.06	10.51		31.1	47.08	92.62	188.88	370.61	677.55	1280.8	2303.8	3833.99	3133.48		26250.8	0	0	0	65.65	4.32	14.68	23573.5	61283.2	<****	0	<****	<****	<****		0.384665
SAFT8-27	0.935	0.0069	80056.5		0.743	194.11	9.02	24.74		98.55	104.98	295.9	594.28	1065.46	1839.78	3081.8	5368.36	8025.02	6374.16		22370.8	0	0	0	85.2	5.47	21.49	36831.4	79464.2	<****	0	<****	<****	<****		0.463496
SAFT8-28	0.935	0.0333	79704.8		0.318	51.42	1.864	4.62		23.64	43.03	70.4	147.45	319.08	635.14	1166.4	2266.7	3880.91	3181.22		25067.5	0	0	0	49.85	3.23	8.37	14683.8	47294.8	<****	0	<****	<****	<****		0.310474
SAFT8-29	0.935	0.0218	79340.5		0.998	51.47	0.912	2.18		11.2	23	37.44	80.47	174.54	355.88	713.9	1442.3	2595.46	2158.75		25845.3	0	0	0	60.89	4.05	10.69	18319.7	59781.1	<****	0	<****	<****	<****		0.306445
SAFT8-3	0.935	0.06	76704		3.11	51.63	1.728	2.63		10.48	24.94	37.46	77.61	180.75	362.67	729.62	1350.29	2278.49	1992.65		24404	0	0	0	58.13	3.9	11.05	19843.8	54624.5	<****	0	<****	<****	<****		0.363277
SAFT8-30	0.935	0.074	77501		2.29	40.93	2.99	4.64		15.18	37.95	59.4	121.29	263.68	548.41	1016.24	2004.34	3404.47	2975.32		25475.9	0	0	0.238	38.9	2.54	6.38	11736.9	37694.3	<****	0	<****	<****	<****		0.311369
SAFT8-31	0.935	0.056	81074.9		1.107	58.47	1.818	4.29		16.95	36.13	62.82	133.9	297.81	608.27	1154.28	2328.66	3760.05	3268.46		25084	0	0	0	49.47	3.39	8.57	15666.2	46913.2	<****	0	<****	<****	<****		0.33394
SAFT8-32	0.935	0.177	75482		15.9	203.46	18.4	27.26		57.53	83	171.57	315.62	627.5	1129.11	1935.78	3412.41	5371.52	4135.96		21252.6	0	0	0	86.95	5.57	27.08	48493.4	81078.4	<****	0	<****	<****	<****		0.598105
SAFT8-33	0.935	0.062	84841.3		0.4	58.52	0.877	2.41		9.96	26.07	40.22	89.37	199.81	394.97	754.83	1498.67	2660.91	2247.52		27517.5	0	0	0	71.62	4.56	14.15	24623.3	66732.9	<****	0	<****	<****	<****		0.368983
SAFT8-34	0.935	0.085	78693.3		2.71	34.13	2.39	4.17		19.42	40.1	62.87	125.57	277.94	543.63	1016.13	1919.54	3410.82	2735.92		26641.9	0	0	0	41.61	2.7	7.18	12849.5	38830.3	<****	0	<****	<****	<****		0.330914
SAFT8-35	0.935	0.0155	76223.4		0.096	34.48	1.579	4.3		20.83	42.87	70.74	146.52	310.36	614	1156.51	2216.43	3770.83	3106.32		25274.2	0	0	0	44.89	2.88	8.16	14639.1	41795.9	<****	0	<****	<****	<****		0.350251
SAFT8-37	0.935	0.059	79184.9		0.1267	27.42	0.924	2.89		11.16	31.85	56.09	105.45	236.95	445.45	826.31	1799.46	2830.82	2777.44		26981.7	0	0	0	37.54	2.39	6.65	13217.2	34865.3	<****	0	<****	<****	<****		0.379094
SAFT8-4	0.935	0	83724.3		0.57	60.17	0.874	2.56		12.76	26.28	50.47	110.47	242.1	498.67	967.06	1883.66	3057.75	2765.18		27203.9	0	0	0	53.42	3.48	9.21	17152.2	50555.8	<****	0	<****	<****	<****		0.339272
SAFT8-5	0.935	0.0072	81481.9		1.449	51	2.61	6.28		25.11	54.64	87.21	186.75	401.32	784.6	1506.48	2905.66	4621.89	4302.17		26443.2	0	0	0	50.02	3.29	9.23	17888	47166.6	<****	0	<****	<****	<****		0.379251
SAFT8-6	0.935	0.082	82384.3		5.21	44.18	9.17	10.72		16.12	42.4	37.18	70.61	169.28	344.27	689.75	1486.74	2364.87	2208.12		27933.3	0	0	0	35.27	2.26	4.89	9539.87	33513.5	<****	0	<****	<****	<****		0.284657
SAFT8-7	0.935	0.096	80035.1		7.7	86.32	3.97	5.22		18	35.89	63.6	129.47	279.6	534.2	1056.28	1950.76	3011.4	2689.4		23346.4	0	0	0	87.08	5.65	19.48	35429.2	80939	<****	0	<****	<****	<****		0.437727
SAFT8-8	0.935	0.0405	84790.2		0.0876	17.71	2.3	7.51		31.65	60.38	88	137.72	222.06	325.2	466.33	759.25	1137.17	1010.47		32762.9	0	0	0	3.68	0.237	0.651	1295.25	3705.69	<****	0	<****	<****	<****		0.34953
SAFT8-9	0.935	0.0143	80156.1		0.266	27.21	0.863	1.248		5.41	16.97	21.5	49	106.43	229.52	493.29	1039.32	1996.08	1697.58		33253.2	0	0	0	39.71	2.56	6.24	11258.1	36830.8	<****	0	<****	<****	<****		0.305671	0.369629
mean	0.935	0.0560848	79978.9		9.76307	76.0979	5.26991	7.53933		23.1633	41.3891	73.9761	151.13	315.773	594.082	1114.02	2111.4	3447.1	2928.02		25687.9	0	0	0.0750909	58.6506	3.83476	11.7767	21735.6	55569.1	#DIV/0!	0	#DIV/0!	#DIV/0!	#DIV/0!
inter_analysis stdev	4.50975e-16	0.0614012	2676.79		28.6886	48.2688	8.24213	7.24607		18.1153	19.1206	53.8044	106.164	195.01	334.349	560.622	966.901	1419.77	1112.93		3190.28	0	0	0.204754	22.2749	1.43833	6.93034	15110.1	20346.4	#DIV/0!	0	#DIV/0!	#DIV/0!	#DIV/0!

## Sheet: means
Element	Si29	Ti49	Zr91		La139	Ce140	Pr141	Nd146	Sm147	Eu153	Gd157	Tb159	Dy163	Ho165	Er167	Tm169	Yb172	Lu175		Hf178	Hg202	Hg201	Pb204	Pb206	Pb207	Pb208	Th232	U238	Pm147	Hg204	Po208	U232	Pu238
SHCR1	4.51195e-16	0.18758	11988.6		73.823	61.3975	76.9236	68.9808	49.5019	14.0662	73.5063	107.285	179.326	256.152	356.652	496.446	685.462	520.143		4581.6	0	0	0.569918	9.26211	0.683449	0.726446	1181.31	9045.71	#DIV/0!	0	#DIV/0!	#DIV/0!	#DIV/0!
WMG1	0.935	0.046588	82078.8		51.6191	89.7168	63.0629	69.7619	103.369	29.3696	239.199	371.247	631.694	954.912	1340.09	2079.28	2747.29	2415.58		48259.7	0	0	0.2728	25.9824	1.94112	2.69148	4696.24	26015	#DIV/0!	0	#DIV/0!	#DIV/0!	#DIV/0!
BFB1	0.935	0.028684	60892.2		33.2177	52.2176	31.3758	32.994	57.7688	21.4196	131.519	203.557	343.154	479.642	656.279	994.897	1399.92	1192.22		31612	0	0	0.0256	4.216	0.40348	0.6818	1091.95	4965.26	#DIV/0!	0	#DIV/0!	#DIV/0!	#DIV/0!
QM1	0.9342	8.64751	66843.8		379.009	363.01	270.474	205.978	228.832	102.525	389.346	533.408	790.552	1141.15	1535.49	2118.3	2619.06	2464.56		45204.1	0	0	2.0704	23.1032	2.2794	3.2018	4730.31	22957.6	#DIV/0!	0	#DIV/0!	#DIV/0!	#DIV/0!
SAFT8	0.935	0.0560848	79978.9		9.76307	76.0979	5.26991	7.53933	23.1633	41.3891	73.9761	151.13	315.773	594.082	1114.02	2111.4	3447.1	2928.02		25687.9	0	0	0.0750909	58.6506	3.83476	11.7767	21735.6	55569.1	#DIV/0!	0	#DIV/0!	#DIV/0!	#DIV/0!
					La	Ce	Pr	Nd	Sm	Eu	Gd	Tb	Dy	Ho	Er	Tm	Yb	Lu
				SHCR1	21.0369	34.125	23.4545	24.2469	43.9544	15.5225	119.768	197.62	350.754	535.788	782.585	1201.04	1643.63	1466.53	Mean
				WMG1	51.6191	89.7168	63.0629	69.7619	103.369	29.3696	239.199	371.247	631.694	954.912	1340.09	2079.28	2747.29	2415.58	Mean
				BFB1	33.2177	52.2176	31.3758	32.994	57.7688	21.4196	131.519	203.557	343.154	479.642	656.279	994.897	1399.92	1192.22	Mean
				QM1	379.009	363.01	270.474	205.978	228.832	102.525	389.346	533.408	790.552	1141.15	1535.49	2118.3	2619.06	2464.56	Mean
				SAFT8	9.76307	76.0979	5.26991	7.53933	23.1633	41.3891	73.9761	151.13	315.773	594.082	1114.02	2111.4	3447.1	2928.02	Mean
